# Supplementary figures and images for: SHP‐2 Phosphatase Prevents Colonic Inflammation by Controlling Secretory Cell Differentiation and Maintaining Host‐Microbiota Homeostasis
Source: PubMed Central journal article supplement — J Cell Physiol. 2016 May 8;231(11):2529–40. doi: 10.1002/jcp.25407 (PMC5330278; doi:10.1002/jcp.25407), 2016-05-08

A

3 days after birth

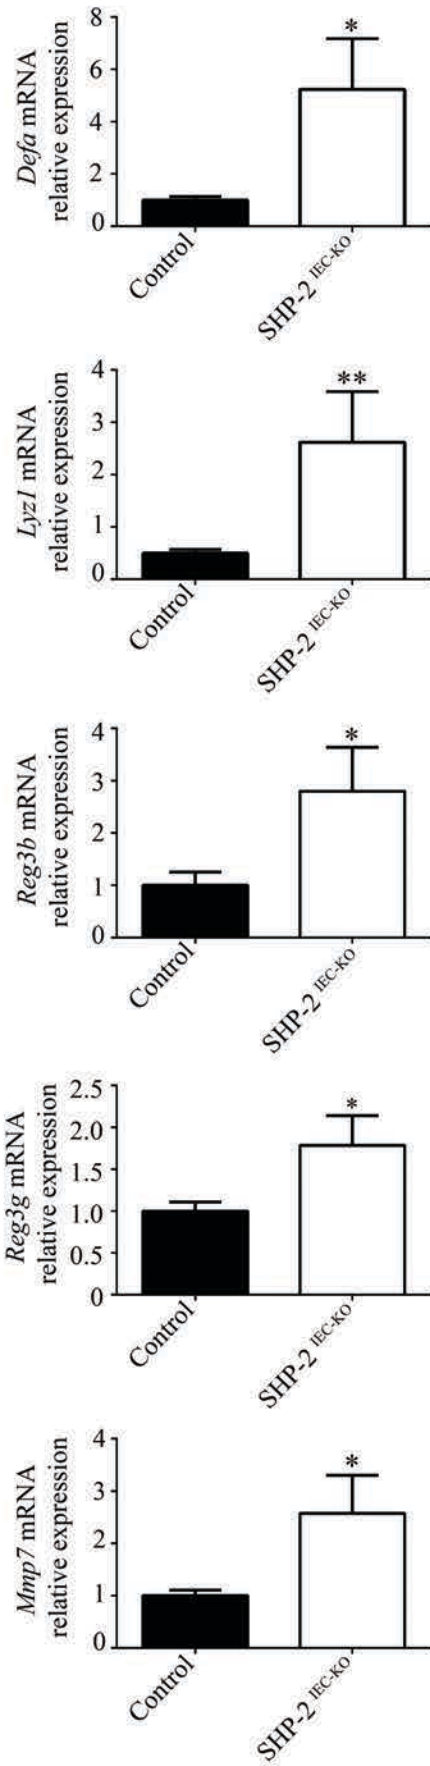

2 weeks after birth

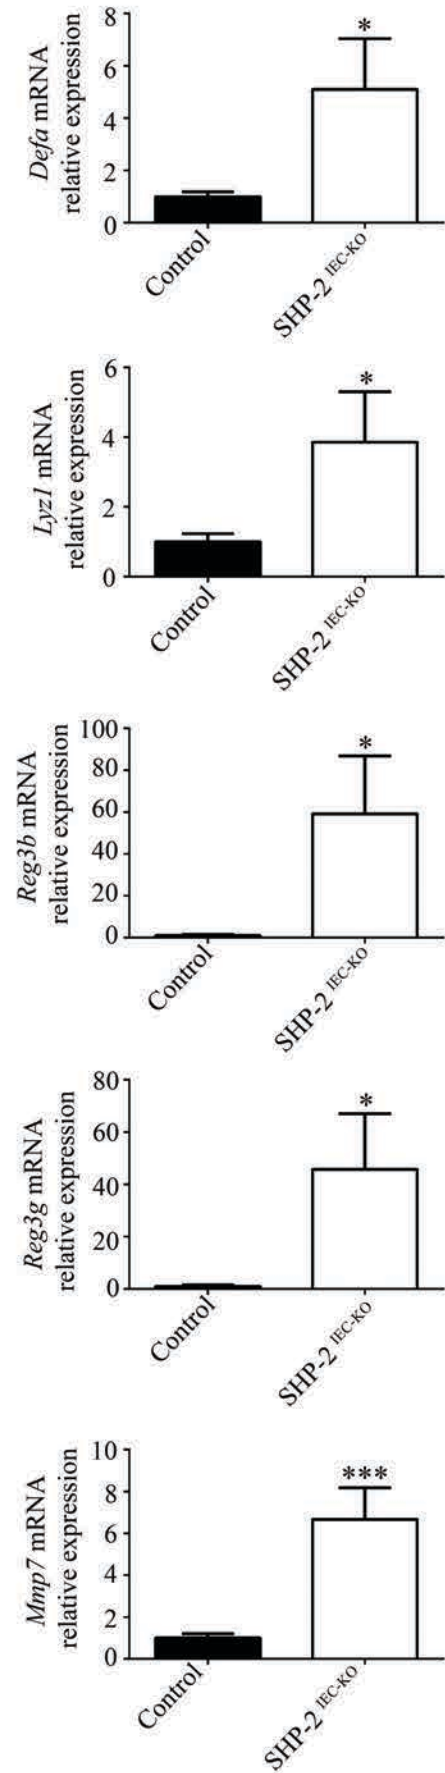

Supplement: NIHMS846979-supplement-Figure_1.pdf [file NIHMS846979-supplement-Figure_1.pdf]

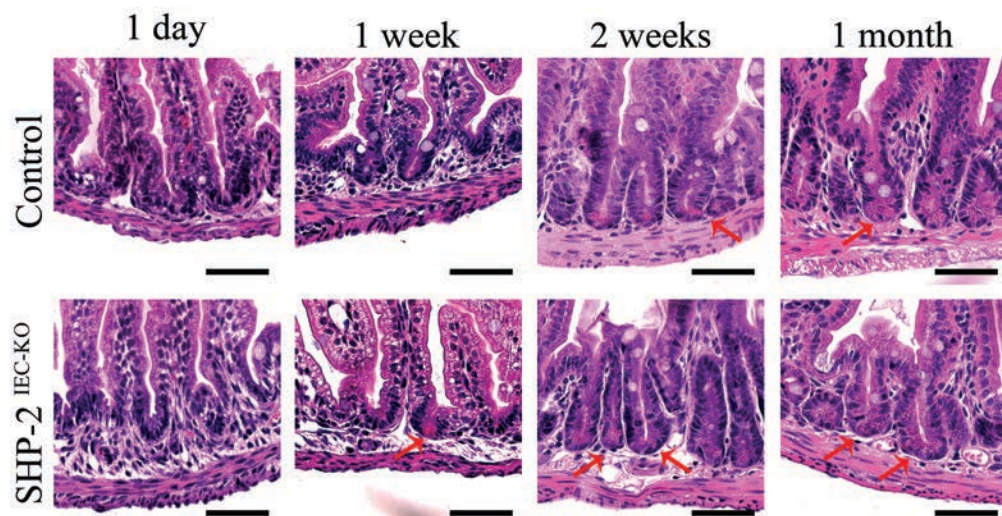

Supplement: NIHMS846979-supplement-Figure_2.pdf [file NIHMS846979-supplement-Figure_2.pdf]
